# Supplementary material for: Most “Dark Matter” Transcripts Are Associated With Known Genes
Source: PubMed Central journal article supplement (PMC2872640; doi:10.1371/journal.pbio.1000371), 2010-05-18

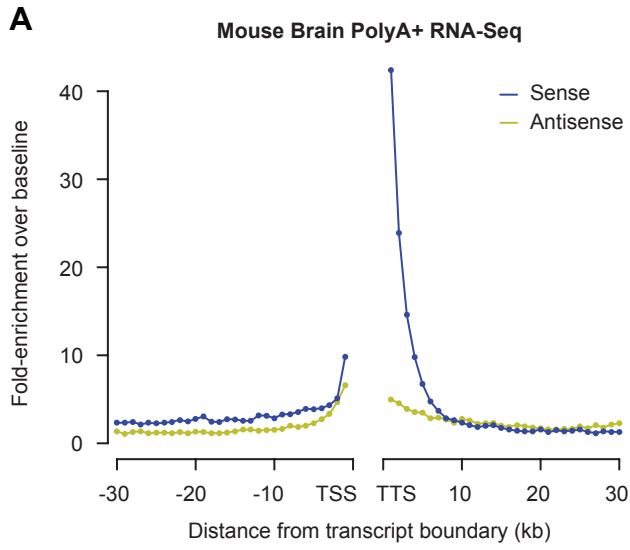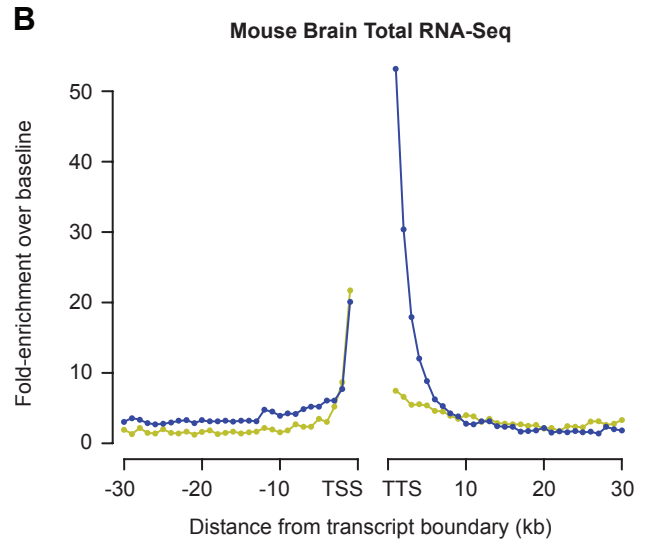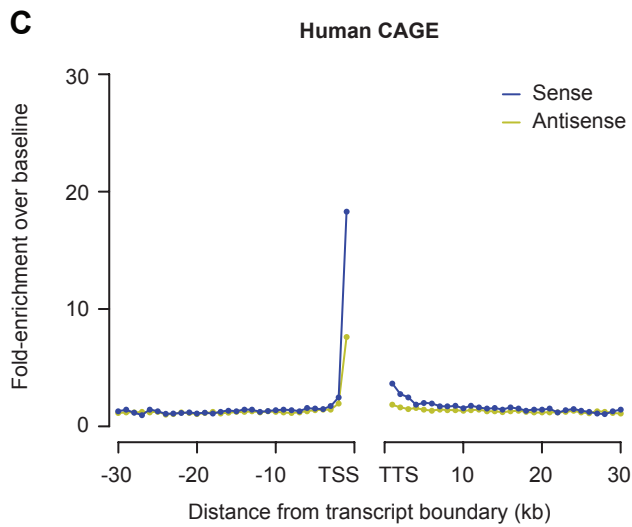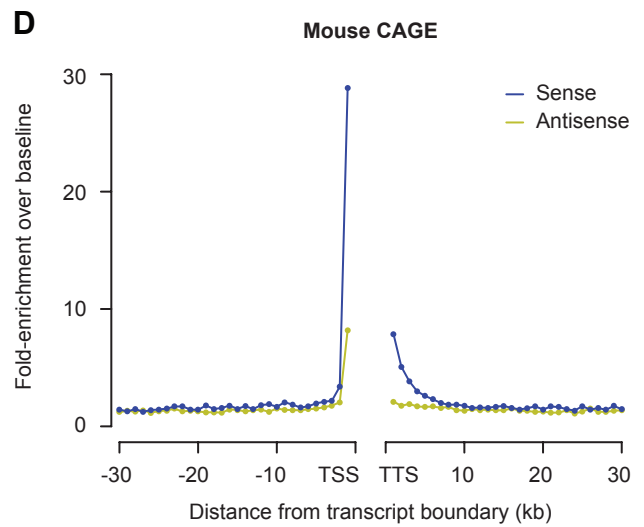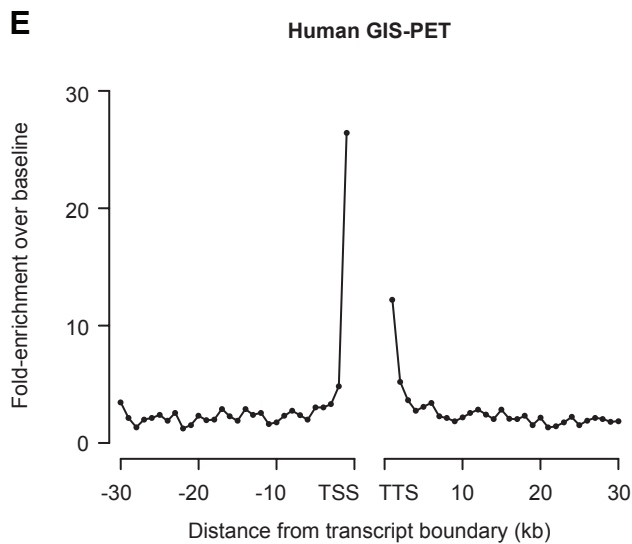

Supplement: pbio.1000371.s001.pdf [file pbio.1000371.s001.pdf]
