# Supplementary material for: Most “Dark Matter” Transcripts Are Associated With Known Genes
Source: PLoS Biol. 2010 May 18;8(5):e1000371. doi: 10.1371/journal.pbio.1000371 (PMC2872640; doi:10.1371/journal.pbio.1000371)
Supplement: Table S6 — (A) Overlap between genomic features and novel exons in human TUs attached to known genes. (B) Overlap between genomic features and exons in human TUs independent from known genes. (0.05 MB PDF) [file pbio.1000371.s014.pdf]

**Table S6A. Overlap between genomic features and novel exons in human TUs attached to known genes**

| Feature set                               | Features  | TU exons | Expected overlap <sup>1)</sup> | Observed overlap | P-value <sup>2)</sup> | References |
|-------------------------------------------|-----------|----------|--------------------------------|------------------|-----------------------|------------|
| <b>5' TU exons</b>                        |           |          |                                |                  |                       |            |
| EvoFold                                   | 47,510    | 723      | 0 (0.0%)                       | 5 (0.7%)         | 0.0004                | [7]        |
| RNAz                                      | 35,985    | 723      | 1 (0.1%)                       | 7 (1.0%)         | 0.0133                | [8]        |
| Exoniphy                                  | 178,162   | 723      | 0 (0.0%)                       | 137 (18.9%)      | < 0.0001              | [9]        |
| DNaseI hotspots, pooled <sup>3)</sup>     | 1,168,817 | 723      | 72 9.96%                       | 519 (71.8%)      | < 0.0001              | [10]       |
| DNaseI hotspots, replicated <sup>4)</sup> | 473,232   | 723      | 43 5.95%                       | 459 (63.5%)      | < 0.0001              | [10]       |
| <b>Internal TU exons</b>                  |           |          |                                |                  |                       |            |
| EvoFold                                   | 47,510    | 3,451    | 3 (0.1%)                       | 30 (0.9%)        | < 0.0001              | [7]        |
| RNAz                                      | 35,985    | 3,451    | 8 (0.2%)                       | 54 (1.6%)        | < 0.0001              | [8]        |
| Exoniphy                                  | 178,162   | 3,451    | 8 (0.2%)                       | 232 (6.7%)       | < 0.0001              | [9]        |
| <b>3' TU exons</b>                        |           |          |                                |                  |                       |            |
| EvoFold                                   | 47,510    | 370      | 0 (0.0%)                       | 1 (0.0%)         | 0.09                  | [7]        |
| RNAz                                      | 35,985    | 370      | 0 (0.0%)                       | 5 (1.4%)         | 0.0006                | [8]        |
| Exoniphy                                  | 178,162   | 370      | 0 (0.0%)                       | 76 (20.5%)       | < 0.0001              | [9]        |

**Table S6B. Overlap between genomic features and exons in human TUs independent from known genes**

| Feature set                                             | Features  | TU exons | Expected overlap <sup>1)</sup> | Observed overlap | P-value <sup>2)</sup> | References |
|---------------------------------------------------------|-----------|----------|--------------------------------|------------------|-----------------------|------------|
| <b>Intergenic TU exons</b>                              |           |          |                                |                  |                       |            |
| EvoFold                                                 | 47,510    | 2,821    | 2 (0.0%)                       | 11 (0.0%)        | < 0.0001              | [7]        |
| RNAz                                                    | 35,985    | 2,821    | 5 (0.2%)                       | 17 (0.6%)        | < 0.0001              | [8]        |
| Exoniphy                                                | 178,162   | 2,821    | 0 (0.0%)                       | 297 (10.5%)      | < 0.0001              | [9]        |
| DNaseI hotspots, pooled <sup>3)</sup>                   | 1,168,817 | 2,821    | 267 (9.5%)                     | 1,194 (42.3%)    | < 0.0001              | [10]       |
| DNaseI hotspots, replicated <sup>4)</sup>               | 473,232   | 2,821    | 164 (5.8%)                     | 945 (33.5%)      | < 0.0001              | [10]       |
| <b>Exons in TUs overlapping genes, sense strand</b>     |           |          |                                |                  |                       |            |
| EvoFold                                                 | 47,510    | 1,069    | 1 (0.1%)                       | 3 (0.3%)         | 0.07                  | [7]        |
| RNAz                                                    | 35,985    | 1,069    | 2 (0.2%)                       | 11 (1.0%)        | < 0.0001              | [8]        |
| Exoniphy                                                | 178,162   | 1,069    | 2 (0.2%)                       | 171 (16.0%)      | < 0.0001              | [9]        |
| <b>Exons in TUs overlapping genes, antisense strand</b> |           |          |                                |                  |                       |            |
| EvoFold                                                 | 47,510    | 2,295    | 2 (0.1%)                       | 11 (0.5%)        | < 0.0001              | [7]        |
| RNAz                                                    | 35,985    | 2,295    | 5 (0.2%)                       | 23 (1.0%)        | < 0.0001              | [8]        |
| Exoniphy                                                | 178,162   | 2,295    | 5 (0.2%)                       | 483 (21.0%)      | < 0.0001              | [9]        |

<sup>1)</sup> Median of the number of seqfrags or seqfrag clusters overlapping with set features in 10,000 permutations, where the positions of seqfrags in intergenic regions were randomized. The percentage of seqfrags or seqfrag clusters that overlap features is indicated between brackets.

<sup>2)</sup> P-value for observed overlap based on the overlap counts in 10,000 randomized permutations

<sup>3)</sup> Aggregate of DNaseI hypersensitive zones identified by the HotSpot algorithm [12] in all replicates of 11 cell lines (BJ, Caco-2, GM06990, HepG2, HL-60, HUVEC, K562, SK-N-SH\_RA, SKMC, Th1, Th2). These data sets were generated by the UW ENCODE group.

<sup>4)</sup> Aggregate of DNaseI hypersensitive zones identified by the HotSpot algorithm in 8 cell lines (BJ, Caco-2, GM06990, HepG2, HL-60, K562, SK-N-SH\_RA, SKMC), selecting only hypersensitive zones that were found in both replicate samples for each cell line. These data sets were generated by the UW ENCODE group.
