# Supplementary material for: Most “Dark Matter” Transcripts Are Associated With Known Genes
Source: PLoS Biol. 2010 May 18;8(5):e1000371. doi: 10.1371/journal.pbio.1000371 (PMC2872640; doi:10.1371/journal.pbio.1000371)
Supplement: Table S8 — (A) Overlap between significant seqfrags in trimmed intergenic regions and genomic features. (B) Overlap between seqfrag clusters in trimmed intergenic regions and genomic features. (0.05 MB PDF) [file pbio.1000371.s016.pdf]

**Table S8A. Overlap between significant seqfrags in trimmed intergenic regions and genomic features**

| Feature set                               | Features  | Seqfrags | Expected overlap <sup>1)</sup> | Observed overlap | P-value <sup>2)</sup> | References |
|-------------------------------------------|-----------|----------|--------------------------------|------------------|-----------------------|------------|
| <b>Human</b>                              |           |          |                                |                  |                       |            |
| EvoFold                                   | 47,510    | 15,646   | 25 (0.2%)                      | 27 (0.2%)        | 0.41                  | [48]       |
| RNAz                                      | 35,985    | 15,646   | 43 (0.3%)                      | 128 (0.8%)       | < 0.0001              | [49]       |
| Exoniphy                                  | 178,162   | 15,646   | 6 (0.0%)                       | 157 (1.0%)       | < 0.0001              | [47]       |
| DNaseI hotspots, pooled <sup>3)</sup>     | 1,168,817 | 15,646   | 1,886 (12.1%)                  | 6,407 (40.9%)    | < 0.0001              | [54]       |
| DNaseI hotspots, replicated <sup>4)</sup> | 473,232   | 15,646   | 1,075 (6.9%)                   | 4,268 (27.3%)    | < 0.0001              | [54]       |
| Heart enhancers                           | 41,930    | 15,646   | 118 (0.8%)                     | 158 (1.0%)       | 0.0005                | [65]       |
| <b>Mouse</b>                              |           |          |                                |                  |                       |            |
| Exoniphy                                  | 172,859   | 11,533   | 2 (0.0%)                       | 261 (2.3%)       | < 0.0001              | [47]       |
| lincRNAs                                  | 2,127     | 11,533   | 4 (0.0%)                       | 95 (0.8%)        | < 0.0001              | [19]       |
| p300 enhancers                            | 4,686     | 11,533   | 13 (0.1%)                      | 33 (0.3%)        | < 0.0001              | [66]       |

**Table S8B. Overlap between seqfrag clusters in trimmed intergenic regions and genomic features**

| Feature set                               | Features  | Clusters | Expected overlap <sup>1)</sup> | Observed overlap | P-value <sup>2)</sup> | References |
|-------------------------------------------|-----------|----------|--------------------------------|------------------|-----------------------|------------|
| <b>Human</b>                              |           |          |                                |                  |                       |            |
| EvoFold                                   | 47,510    | 7,976    | 25 (0.3%)                      | 25 (0.3%)        | 0.11                  | [48]       |
| RNAz                                      | 35,985    | 7,976    | 37 (0.5%)                      | 99 (1.2%)        | < 0.0001              | [49]       |
| Exoniphy                                  | 178,162   | 7,976    | 5 (0.1%)                       | 114 (1.4%)       | < 0.0001              | [47]       |
| DNaseI hotspots, pooled <sup>3)</sup>     | 1,168,817 | 7,976    | 1,215 (15.2%)                  | 3,528 (44.2%)    | < 0.0001              | [54]       |
| DNaseI hotspots, replicated <sup>4)</sup> | 473,232   | 7,976    | 675 (8.5%)                     | 2,320 (29.1%)    | < 0.0001              | [54]       |
| Heart enhancers                           | 41,930    | 7,976    | 79 (1.0%)                      | 103 (1.3%)       | 0.0050                | [65]       |
| <b>Mouse</b>                              |           |          |                                |                  |                       |            |
| Exoniphy                                  | 172,859   | 5,506    | 2 (0.0%)                       | 192 (3.5%)       | < 0.0001              | [47]       |
| lincRNAs                                  | 2,127     | 5,506    | 2 (0.0%)                       | 31 (0.6%)        | < 0.0001              | [19]       |
| p300 enhancers                            | 4,686     | 5,506    | 7 (0.1%)                       | 16 (0.3%)        | 0.0052                | [66]       |

<sup>1)</sup> Median of the number of seqfrags or seqfrag clusters overlapping with set features in 10,000 permutations, where the positions of seqfrags in intergenic regions were randomized. The percentage of seqfrags or seqfrag clusters that overlap features is indicated between brackets.

<sup>2)</sup> P-value for observed overlap based on the overlap counts in 10,000 randomized permutations

<sup>3)</sup> Aggregate of DNaseI hypersensitive zones identified by the HotSpot algorithm [14] in all replicates of 11 cell lines (BJ, Caco-2, GM06990, HepG2, HL-60, HUVEC, K562, SK-N-SH\_RA, SKMC, Th1, Th2). These data sets were generated by the UW ENCODE group.

<sup>4)</sup> Aggregate of DNaseI hypersensitive zones identified by the HotSpot algorithm in 8 cell lines (BJ, Caco-2, GM06990, HepG2, HL-60, K562, SK-N-SH\_RA, SKMC), selecting only hypersensitive zones that were found in both replicate samples for each cell line. These data sets were generated by the UW ENCODE group.
