# Supplementary material for: Most “Dark Matter” Transcripts Are Associated With Known Genes
Source: PLoS Biol. 2010 May 18;8(5):e1000371. doi: 10.1371/journal.pbio.1000371 (PMC2872640; doi:10.1371/journal.pbio.1000371)
Supplement: Table S9 — RNA sources for tiling array experiments. (0.04 MB PDF) [file pbio.1000371.s017.pdf]

**Table S9. RNA sources for tiling array experiments**

| <b>Sample type</b>       | <b>Supplier</b> | <b>Catalog No</b> | <b>Lot No</b> | <b>Description</b>                                                                                      |
|--------------------------|-----------------|-------------------|---------------|---------------------------------------------------------------------------------------------------------|
| Human Brain Poly A+ RNA  | Clontech        | 636102            | 6120217       | Whole brain pooled from 8 Caucasian males, ages 43-66; cause of death: sudden death                     |
| Human Heart Poly A+ RNA  | Clontech        | 636113            | 6060184       | Normal human heart pooled from 3 Caucasian males, ages 33, 55 and 55; cause of death: trauma            |
| Human Liver Poly A+ RNA  | Clontech        | 636101            | 6100188       | Normal, whole liver pooled from 1 male Caucasian, age 35; cause of death: sudden death                  |
| Human Testis Poly A+ RNA | Clontech        | 636115            | 6090242       | Normal, human testis pooled from 45 male Caucasians, ages 14-64 years old; cause of death: sudden death |
| Human Brain Total RNA    | Clontech        | 636530            | 6120234       | Normal, whole brains from 2 male Caucasians, ages 47-55; cause of death: sudden death                   |
| Human Heart Total RNA    | Clontech        | 636532            | 7030456       | Normal human heart pooled from 3 male/female Caucasians; ages 20-42; cause of death: trauma             |
| Human Liver Total RNA    | Clontech        | 636531            | 7030174       | Normal liver pooled from a 51-yr-old male Caucasian; cause of death: sudden death                       |
| Human Testis Total RNA   | Clontech        | 636533            | 7010255       | Normal human testis pooled from 39 Caucasians, ages 14-64; cause of death: sudden death                 |
| Mouse Brain Poly A+ RNA  | Clontech        | 6616-1            | 4020586       | Normal, whole brains pooled from 600 male/female BALB/c mice, age 8-12 weeks                            |
| Mouse Heart Poly A+ RNA  | Clontech        | 6611-1            | 3030999       | Normal hearts pooled from 200 male/female BALB/c mice, ages: 8-12 weeks                                 |
| Mouse Heart Poly A+ RNA  | Clontech        | 636202            | 7060284       | Normal whole hearts pooled from 1600 female BALB/c mice; ages 8-12 weeks                                |
| Mouse Liver Poly A+ RNA  | Clontech        | 636201            | 4020159       | Normal mouse livers pooled from >300 male/female BALB/c mice, ages 6-12 weeks                           |
| Mouse Testis Poly A+ RNA | Clontech        | 636203            | 5010515       | Normal mouse testis pooled from 200 male BALB/c mice, ages 8-12 weeks                                   |
| Mouse Brain Total RNA    | Clontech        | 636601            | 6100187       | Normal, whole brains pooled from 600 BALB/c mice, ages 9-12 weeks                                       |
| Mouse Liver Total RNA    | Clontech        | 636603            | 5110355       | Normal, whole liver pooled from 800 male BALB/c mice, ages: 9-12 weeks                                  |
| Mouse Testis Total RNA   | Clontech        | 636606            | 7040109       | Normal testis pooled from 200 male BALB/c mice; ages 6-10 weeks                                         |
| Mouse Heart Total RNA    | Clontech        | 636602            | 7050138       | Normal whole hearts pooled from 200 BALB/c male/female mice, ages: 8-12 weeks                           |
